# Supplementary material
Source: Springer Nature journal article supplement (https://www.springermedizin.de/resource/supplementary/13002_2010_204_MOESM1_ESM.pdf/9627384)

Far-Western

Mid-Western

Western

Central

Eastern

Study Site

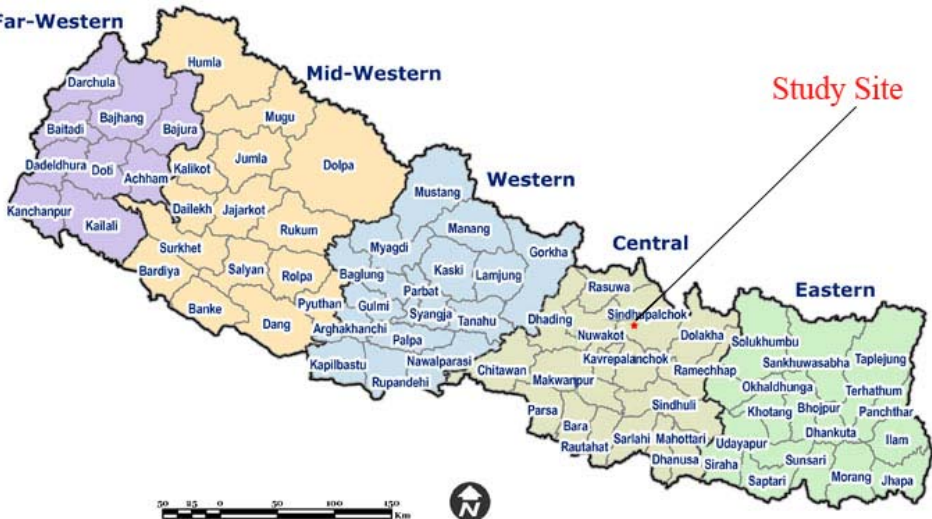

Supplement: MOESM1 [file 9627384]
